# Supplementary material for: The TFIIE-related Rpc82 subunit of RNA polymerase III interacts with the TFIIB-related transcription factor Brf1 and the polymerase cleft for transcription initiation
Source: PubMed Central journal article supplement — Nucleic Acids Res. 2017 Nov 21;46(3):1157–66. doi: 10.1093/nar/gkx1179 (PMC5814912; doi:10.1093/nar/gkx1179), 2017-11-21
Supplement: gkx1179_supp.pdf [file gkx1179_supp.pdf]

# Supplementary Figure 1

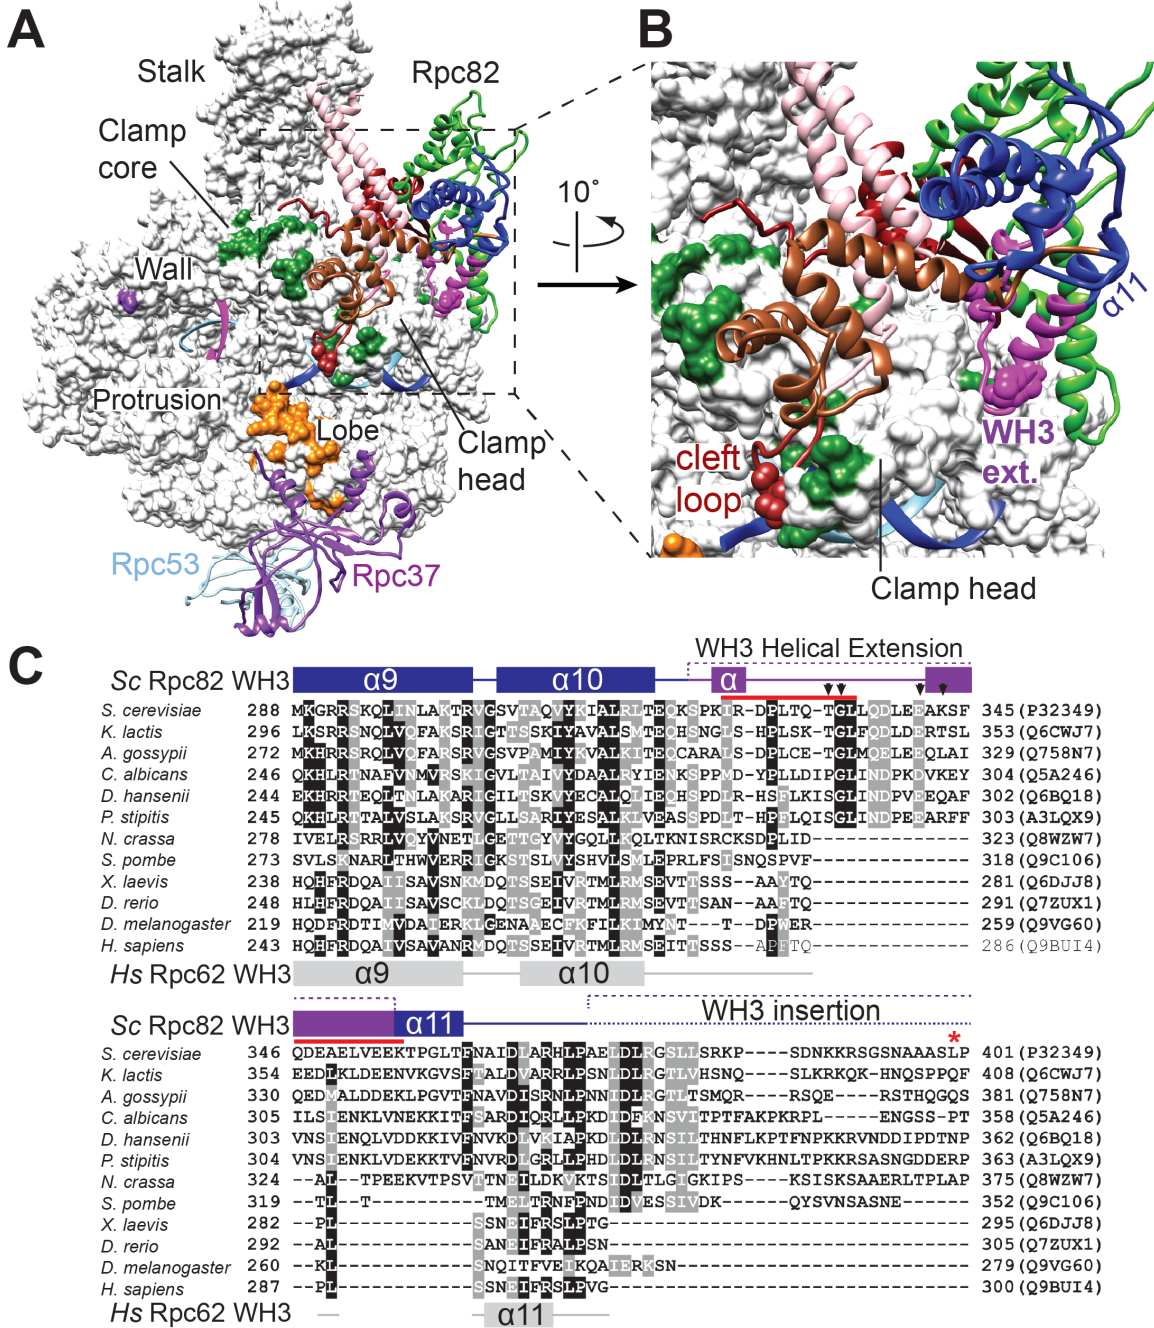

**Supplementary Figure 1.** BPA cross-linking in the pol III cleft and multiple sequence alignment of the Rpc82 WH3 helical extension. (A) The pol III model is shown as in Figure 1B and C. Positions of BPA crosslinking with Rpc82 and Rpc37 are colored green

and orange, respectively. Rpc82- and Rpc37-crosslinking sites are distributed in the clamp and lobe domains, respectively, consistent with protein binding in the cryo-EM structure. A purple-colored position in the wall domain denotes a previously identified BPA crosslinking site with Brf1. **(B)** A view of Rpc82 interaction with the clamp head region of Rpc160. The helical extension of WH3 and the cleft loop of WH4 are indicated. Positions in the helical extension are displayed with spheres to indicate BPA crosslinking with Rpc160. Several residues in the cleft loop are highlighted with spheres to indicate BPA crosslinking with both Rpc160 and Rpc128. **(C)** Multiple sequence alignment of Rpc82 orthologs. Amino acid sequences of the Rpc82 helical extension and flanking regions are listed in the alignment. Secondary structures in *Sc*Rpc82 and *Hs*Rpc62 are indicated. Arrowheads point to residues crosslinking with Rpc160 with BPA substitutions. The Rpc160 crosslinking sites are also displayed with spheres in (B). Red bars denote Rpc82 deletions that conferred a temperature-sensitive cell growth phenotype. A red asterisk indicates the amino acid position Leu400 involved in BPA crosslinking with Brf1. Uniprot accession numbers are listed on the right (in parentheses).

**Supplemental Table 1. Summary of BPA photo-crosslinking in the Rpc82 WH3 insertion (Leu370-Ala450) and the Rpc82 WH4 cleft loop (Thr554, Ala555, and Ser558)**

| Position | Growth (BPA) | Crosslinking | Crosslinked polypeptide |
|----------|--------------|--------------|-------------------------|
| Leu370   | +            | No           |                         |
| Leu380   | +            | No           |                         |
| Lys390   | +            | No           |                         |
| Ser392   | +            | No           |                         |
| Ser394   | +            | Yes          | Not identified          |
| Ala396   | +            | Yes          | Not identified          |
| Ala398   | +            | No           |                         |
| Leu400   | +            | Yes          | Brf1, C34               |
| Ser402   | +            | No           |                         |
| Lys404   | +            | No           |                         |
| Lys406   | +            | No           |                         |
| Glu408   | +            | Yes          | Not identified          |
| Gly410   | –            |              |                         |
| Val412   | +            | Yes          | Not identified          |
| Pro414   | +            | No           |                         |
| Leu416   | +            | No           |                         |
| Ala418   | +            | No           |                         |
| Val420   | +            | Yes          | Not identified          |
| Ser421   | +            | No           |                         |
| Lys422   | +            | No           |                         |
| Ser423   | +            | No           |                         |
| Leu424   | +            | No           |                         |
| Gln425   | +            | No           |                         |
| Glu426   | +            | No           |                         |
| Ser427   | +            | No           |                         |
| Gly428   | +            | No           |                         |
| Asp429   | +            | No           |                         |
| Thr430   | +            | No           |                         |
| Gln431   | +            | No           |                         |
| Glu432   | +            | No           |                         |
| Glu433   | +            | No           |                         |
| Asp434   | +            | Yes          | Not identified          |
| Glu435   | +            | No           |                         |
| Glu436   | +            | No           |                         |
| Glu437   | +            | No           |                         |
| Glu438   | +            | No           |                         |
| Asp439   | +            | No           |                         |
| Leu440   | +            | No           |                         |
| Asp441   | +            | No           |                         |

|        |   |     |                |
|--------|---|-----|----------------|
| Ala442 | + | No  |                |
| Asp443 | + | No  |                |
| Thr444 | + | No  |                |
| Glu445 | + | No  |                |
| Asp446 | - |     |                |
| Pro447 | + | No  |                |
| His448 | - |     |                |
| Ser449 | + | No  |                |
| Ala450 | + | No  |                |
| Thr554 | + | Yes | Rpc128         |
| Ala555 | + | Yes | Rpc160, Rpc128 |
| Ser558 | + | Yes | Rpc160, Rpc128 |

Positions of BPA substitution in Rpc82 are indicated and the growth of each substitution is shown as “+”: viable strain or “-”: lethal.

**Supplemental Table 2. Summary of BPA photo-crosslinking in the Rpc128 protrusion (Ala413-Lys445) and wall (Thr794-Pro876) domains**

| Position | Growth (BPA) | Crosslinking | Crosslinked polypeptide |
|----------|--------------|--------------|-------------------------|
| Ala413   | +            | Yes          | Rpc82                   |
| Ser421   | +            | Yes          | Rpc82                   |
| Ile422   | +            | Yes          | Rpc82                   |
| Asn423   | +            | Yes          | Rpc82                   |
| Val424   | +            | Yes          | Rpc82                   |
| His425   | +            | Yes          | Rpc82                   |
| Ser426   | +            | Yes          | Rpc82                   |
| Asn427   | +            | Yes          | Rpc82                   |
| Asn428   | +            | Yes          | Rpc82                   |
| Ser431   | +            | Yes          | Rpc82                   |
| Asn434   | +            | Yes          | Rpc82                   |
| Arg435   | +            | Yes          | Rpc82                   |
| Lys445   | +            | Yes          | Rpc82                   |
| Val794   | +            | Yes          | Rpc82                   |
| Tyr798   | -            |              |                         |
| Ala799   | +            | No           |                         |
| Asn800   | -            |              |                         |
| His801   | +            | Yes          | Rpc82, Brf1             |
| Thr802   | +            | Yes          | Rpc82                   |
| Gln803   | +            | Yes          | Rpc82                   |
| Asp804   | -            |              |                         |
| Ile805   | -            |              |                         |

|        |   |     |                |
|--------|---|-----|----------------|
| Gly807 | + | Yes | Not identified |
| Glu813 | + | Yes | Not identified |
| Gly815 | + | No  |                |
| Ile818 | + | No  |                |
| Gln822 | + | No  |                |
| Pro826 | - |     |                |
| Asn850 | + | Yes | Rpc82          |
| Ala852 | + | Yes | Rpc160         |
| Asp853 | + | Yes | Rpc160         |
| Asn856 | + | Yes | Rpc82, Rpc160  |
| Pro857 | + | Yes | Not identified |
| Asn858 | + | Yes | Rpc82, Rpc160  |
| Asn859 | + | Yes | Rpc82, Rpc160  |
| Asn861 | + | Yes | Rpc82, Rpc160  |
| Val862 | + | Yes | Rpc82, Rpc160  |
| Gln863 | + | Yes | Rpc82          |
| Thr864 | + | Yes | Rpc82          |
| Tyr866 | + | Yes | Rpc82          |
| Arg867 | + | Yes | Rpc82          |
| Glu868 | + | Yes | Rpc82          |
| Ala869 | + | Yes | Rpc82          |
| Val871 | + | No  |                |
| Ile872 | + | Yes | Rpc82          |
| Arg874 | + | Yes | Rpc82          |
| Pro876 | + | Yes | Rpc82, Rpc160  |

Positions of BPA substitution in Rpc128 protrusion and wall domains are indicated. “+” : viable strain; “-”: lethal.
